# Supplementary material
Source: MDPI journal article supplement (https://www.mdpi.com/2073-445X/12/3/695)
Supplement: s1 [file s1]

## Supplementary Material.

**Table S1.** Tonnes and proportions of total HANPP and HANPP from crops in 1997, 2002, 2007 and 2012 derived from livestock grazing, timber, and crops allocated to human food, livestock feed, biofiber, biofuel and exports for a) all HANPP, b) all crops, and c) corn grain. These data are graphed in Figure 3.

|                    | 1997           |          | 2002           |          | 2007           |          | 2012           |          |
|--------------------|----------------|----------|----------------|----------|----------------|----------|----------------|----------|
|                    | Million tonnes | Prop     |
| <i>Total HANPP</i> |                |          |                |          |                |          |                |          |
| Direct food        | 101            | .129     | 89             | .124     | 105            | .126     | 95             | .132     |
| Livestock feed     | 395            | .504     | 374            | .521     | 392            | .470     | 305            | .422     |
| Biofiber           | 141            | .180     | 121            | .169     | 140            | .168     | 97             | .134     |
| Biofuel            | 11             | .014     | 15             | .020     | 56             | .068     | 98             | .136     |
| Exports            | 135            | .173     | 118            | .165     | 141            | .169     | 127            | .176     |
| <b>Total</b>       | <b>784</b>     | <b>1</b> | <b>717</b>     | <b>1</b> | <b>834</b>     | <b>1</b> | <b>722</b>     | <b>1</b> |
| <i>Crop HANPP</i>  |                |          |                |          |                |          |                |          |
| Direct food        | 101            | .181     | 89             | .172     | 105            | .170     | 96             | .172     |
| Livestock feed     | 319            | .570     | 298            | .579     | 320            | .520     | 240            | .435     |
| Biofiber           | 2              | .004     | 2              | .019     | 1              | .002     | 1              | .002     |
| Biofuel            | 11             | .019     | 15             | .028     | 56             | .092     | 98             | .178     |
| Exports            | 126            | .225     | 112            | .217     | 133            | .216     | 118            | .213     |
| <b>Total</b>       | <b>559</b>     | <b>1</b> | <b>515</b>     | <b>1</b> | <b>615</b>     | <b>1</b> | <b>552</b>     | <b>1</b> |
| <i>Corn HANPP</i>  |                |          |                |          |                |          |                |          |
| Direct food        | 29             | .146     | 27             | .138     | 35             | .127     | 26             | .115     |
| Livestock feed     | 121            | .600     | 115            | .596     | 138            | .494     | 83             | .361     |
| Biofiber           | 0              | .000     | 0              | .000     | 0              | .000     | 0              | .000     |
| Biofuel            | 10             | .050     | 14             | .072     | 53             | .189     | 92             | .401     |
| Exports            | 41             | .204     | 38             | .194     | 53             | .19      | 28             | .123     |
| <b>Total</b>       | <b>201</b>     | <b>1</b> | <b>193</b>     | <b>1</b> | <b>280</b>     | <b>1</b> | <b>229</b>     | <b>1</b> |

**Table S2.** Mass (in kilotonnes) and proportions of total HANPP allocated to food, feed, fiber fuel and exports by U.S. state in 2012. The item with the highest proportion in each state is italicized. These data are mapped in Figure 4a.

|                | Total | Food  |      | Feed  |      | Fiber |      | Fuel  |      | Exports |      |
|----------------|-------|-------|------|-------|------|-------|------|-------|------|---------|------|
| State          | kT    | kT    | Prop | kT    | Prop | kT    | Prop | kT    | Prop | kT      | Prop |
| Alabama        | 12477 | 505   | .040 | 3041  | .244 | 7374  | .591 | 272   | .022 | 1285    | .103 |
| Arizona        | 3270  | 85    | .027 | 2753  | .842 | 264   | .081 | 0     | .000 | 167     | .051 |
| Arkansas       | 16588 | 1748  | .106 | 4400  | .265 | 4880  | .294 | 1329  | .080 | 4231    | .255 |
| California     | 14504 | 4271  | .294 | 3153  | .217 | 3147  | .217 | 352   | .024 | 3581    | .247 |
| Colorado       | 11024 | 1516  | .137 | 6634  | .602 | 280   | .025 | 1147  | .104 | 1448    | .131 |
| Connecticut    | 444   | 16    | .036 | 229   | .516 | 144   | .326 | 34    | .077 | 20      | .046 |
| Delaware       | 991   | 108   | .109 | 392   | .395 | 52    | .053 | 220   | .222 | 220     | .222 |
| Florida        | 9962  | 2627  | .264 | 2479  | .249 | 4109  | .413 | 52    | .005 | 695     | .070 |
| Georgia        | 16413 | 1754  | .107 | 2675  | .163 | 9120  | .556 | 493   | .030 | 2371    | .144 |
| Idaho          | 12210 | 3007  | .246 | 5420  | .444 | 1836  | .150 | 0     | .000 | 1947    | .160 |
| Illinois       | 41315 | 3819  | .092 | 17027 | .412 | 127   | .003 | 11576 | .280 | 8766    | .212 |
| Indiana        | 21193 | 1749  | .083 | 9119  | .430 | 342   | .016 | 5423  | .256 | 4560    | .215 |
| Iowa           | 56106 | 4668  | .083 | 24423 | .435 | 447   | .008 | 16671 | .297 | 9897    | .176 |
| Kansas         | 29536 | 5949  | .201 | 11049 | .374 | 162   | .005 | 4052  | .137 | 8323    | .282 |
| Kentucky       | 11165 | 719   | .064 | 4409  | .395 | 3230  | .289 | 984   | .088 | 1823    | .163 |
| Louisiana      | 12089 | 1482  | .123 | 2230  | .185 | 5407  | .447 | 953   | .079 | 2016    | .167 |
| Maine          | 2799  | 144   | .052 | 690   | .247 | 1690  | .604 | 32    | .012 | 242     | .086 |
| Maryland       | 3503  | 378   | .108 | 1444  | .412 | 453   | .129 | 469   | .134 | 760     | .217 |
| Massachusetts  | 442   | 24    | .055 | 292   | .661 | 75    | .169 | 30    | .067 | 21      | .047 |
| Michigan       | 16201 | 1963  | .121 | 4865  | .300 | 3766  | .232 | 2810  | .173 | 2797    | .173 |
| Minnesota      | 47496 | 5859  | .123 | 18671 | .393 | 2241  | .047 | 12177 | .256 | 8547    | .180 |
| Mississippi    | 12724 | 843   | .066 | 4369  | .343 | 3674  | .289 | 1268  | .100 | 2570    | .201 |
| Missouri       | 17988 | 1404  | .078 | 9143  | .508 | 1270  | .071 | 2367  | .132 | 3804    | .211 |
| Montana        | 16108 | 4214  | .262 | 7878  | .489 | 839   | .052 | 51    | .003 | 3127    | .194 |
| Nebraska       | 40893 | 4064  | .100 | 18647 | .456 | 120   | .003 | 11399 | .279 | 6663    | .163 |
| Nevada         | 1755  | 16    | .009 | 1686  | .961 | 44    | .025 | 0     | .000 | 8       | .005 |
| New Hampshire  | 655   | 8     | .012 | 263   | .402 | 322   | .492 | 19    | .029 | 43      | .065 |
| New Jersey     | 824   | 64    | .078 | 445   | .540 | 109   | .132 | 93    | .113 | 112     | .136 |
| New Mexico     | 3850  | 109   | .028 | 3341  | .868 | 229   | .059 | 53    | .014 | 117     | .031 |
| New York       | 7931  | 511   | .064 | 5786  | .729 | 271   | .034 | 802   | .101 | 561     | .071 |
| North Carolina | 13215 | 1124  | .085 | 4923  | .372 | 3438  | .260 | 940   | .071 | 2792    | .211 |
| North Dakota   | 36482 | 10468 | .287 | 12299 | .337 | 0     | .000 | 3836  | .105 | 9879    | .271 |
| Ohio           | 19477 | 1472  | .076 | 8081  | .415 | 1758  | .090 | 4032  | .207 | 4134    | .212 |
| Oklahoma       | 11255 | 2147  | .191 | 5355  | .476 | 770   | .068 | 334   | .030 | 2651    | .235 |
| Oregon         | 12184 | 974   | .080 | 3466  | .284 | 6183  | .507 | 0     | .000 | 1562    | .128 |
| Pennsylvania   | 12079 | 519   | .043 | 6554  | .543 | 2867  | .237 | 1161  | .096 | 979     | .081 |
| Rhode Island   | 109   | 3     | .029 | 57    | .523 | 40    | .367 | 5     | .042 | 4       | .040 |
| South Carolina | 9304  | 421   | .045 | 1529  | .164 | 5751  | .618 | 350   | .038 | 1253    | .135 |

|               |               |              |             |               |             |              |             |              |             |               |             |
|---------------|---------------|--------------|-------------|---------------|-------------|--------------|-------------|--------------|-------------|---------------|-------------|
| South Dakota  | 30243         | 3500         | .116        | 17007         | .562        | 220          | .007        | 4830         | .160        | 4687          | .155        |
| Tennessee     | 9961          | 555          | .056        | 3608          | .362        | 3392         | .341        | 775          | .078        | 1630          | .164        |
| Texas         | 24626         | 2485         | .101        | 10861         | .441        | 4371         | .177        | 2567         | .104        | 4341          | .177        |
| Utah          | 3079          | 63           | .021        | 2896          | .940        | 98           | .031        | 0            | .000        | 22            | .007        |
| Vermont       | 1492          | 28           | .019        | 1065          | .714        | 243          | .163        | 96           | .064        | 60            | .040        |
| Virginia      | 10614         | 361          | .034        | 4203          | .396        | 4617         | .435        | 321          | .030        | 1111          | .105        |
| Washington    | 14836         | 3261         | .220        | 3265          | .220        | 5091         | .343        | 211          | .014        | 3008          | .203        |
| West Virginia | 1816          | 20           | .011        | 1382          | .763        | 317          | .175        | 40           | .022        | 52            | .029        |
| Wisconsin     | 16485         | 1561         | .095        | 7708          | .468        | 1410         | .086        | 3496         | .212        | 2310          | .140        |
| Wyoming       | 3792          | 276          | .073        | 3269          | .862        | 75           | .020        | 54           | .014        | 117           | .031        |
| <b>TOTAL</b>  | <b>673502</b> | <b>82862</b> | <b>.123</b> | <b>274482</b> | <b>.408</b> | <b>96667</b> | <b>.144</b> | <b>98175</b> | <b>.146</b> | <b>121316</b> | <b>.180</b> |

**Table S3.** Mass (in kilotonnes) and proportions of crop-based HANPP allocated to food, feed, fiber fuel and exports by U.S. state for 2012. The item with the highest proportion in each state is italicized. These data are mapped in Figure 4b.

|                | Total | Food  |      | Feed  |      | Fiber |      | Fuel  |      | Exports |      |
|----------------|-------|-------|------|-------|------|-------|------|-------|------|---------|------|
| State          | kT    | kT    | Prop | kT    | Prop | kT    | Prop | kT    | Prop | kT      | Prop |
| Alabama        | 3153  | 505   | .160 | 1760  | .558 | 34    | .011 | 272   | .086 | 583     | .185 |
| Arizona        | 1983  | 85    | .043 | 1733  | .874 | 26    | .013 | 0     | .000 | 137     | .069 |
| Arkansas       | 9996  | 1748  | .175 | 3113  | .311 | 46    | .005 | 1329  | .133 | 3761    | .376 |
| California     | 9142  | 4271  | .467 | 1267  | .139 | 54    | .006 | 352   | .038 | 3198    | .350 |
| Colorado       | 8701  | 1516  | .174 | 4619  | .531 | 0     | .000 | 1147  | .132 | 1419    | .163 |
| Connecticut    | 283   | 16    | .057 | 221   | .781 | 0     | .000 | 34    | .121 | 12      | .041 |
| Delaware       | 899   | 108   | .120 | 356   | .396 | 0     | .000 | 220   | .245 | 215     | .239 |
| Florida        | 3593  | 2627  | .731 | 649   | .181 | 5     | .002 | 52    | .014 | 259     | .072 |
| Georgia        | 5200  | 1754  | .337 | 1379  | .265 | 137   | .026 | 493   | .095 | 1436    | .276 |
| Idaho          | 8854  | 3007  | .340 | 4129  | .466 | 0     | .000 | 0     | .000 | 1718    | .194 |
| Illinois       | 40416 | 3819  | .094 | 16263 | .402 | 0     | .000 | 11576 | .286 | 8758    | .217 |
| Indiana        | 20073 | 1749  | .087 | 8363  | .417 | 0     | .000 | 5423  | .270 | 4539    | .226 |
| Iowa           | 54679 | 4668  | .085 | 23470 | .429 | 0     | .000 | 16671 | .305 | 9870    | .181 |
| Kansas         | 26032 | 5949  | .229 | 7716  | .296 | 1     | .000 | 4052  | .156 | 8314    | .319 |
| Kentucky       | 5604  | 719   | .128 | 2274  | .406 | 0     | .000 | 984   | .176 | 1627    | .290 |
| Louisiana      | 5509  | 1482  | .269 | 1574  | .286 | 20    | .004 | 953   | .173 | 1479.   | .269 |
| Maine          | 876   | 144   | .165 | 667   | .761 | 0     | .000 | 32.   | .037 | 33      | .037 |
| Maryland       | 2840  | 378   | .133 | 1268  | .446 | 0     | .000 | 469   | .165 | 727     | .256 |
| Massachusetts  | 353   | 24    | .069 | 288   | .815 | 0     | .000 | 30    | .084 | 11      | .033 |
| Michigan       | 11867 | 1963  | .165 | 4566  | .385 | 0     | .000 | 2810  | .237 | 2528    | .213 |
| Minnesota      | 44715 | 5859  | .131 | 18298 | .409 | 0     | .000 | 12177 | .272 | 8380    | .187 |
| Mississippi    | 7530  | 843   | .112 | 3240  | .430 | 41    | .005 | 1268  | .168 | 2138    | .284 |
| Missouri       | 14012 | 1404  | .100 | 6482  | .463 | 31    | .002 | 2367  | .169 | 3727    | .266 |
| Montana        | 11437 | 4214  | .368 | 4150  | .363 | 0     | .000 | 51    | .004 | 3022    | .264 |
| Nebraska       | 37851 | 4064  | .107 | 15733 | .416 | 0     | .000 | 11399 | .301 | 6655    | .176 |
| Nevada         | 872   | 16    | .018 | 854   | .979 | 0     | .000 | 0     | .000 | 3       | .003 |
| New Hampshire  | 296   | 8     | .026 | 262   | .887 | 0     | .000 | 19    | .065 | 7       | .022 |
| New Jersey     | 688   | 64    | .093 | 425   | .617 | 0     | .000 | 93    | .136 | 106     | .154 |
| New Mexico     | 1182  | 109   | .092 | 927   | .784 | 3     | .003 | 53    | .045 | 89      | .076 |
| New York       | 7403  | 511   | .069 | 5563  | .751 | 0     | .000 | 802   | .108 | 528     | .071 |
| North Carolina | 8874  | 1124  | .127 | 4379  | .493 | 53    | .006 | 940   | .106 | 2379    | .268 |
| North Dakota   | 34128 | 10468 | .307 | 9945  | .291 | 0     | .000 | 3836  | .112 | 9879    | .289 |
| Ohio           | 16519 | 1472  | .089 | 6988  | .423 | 0     | .000 | 4032  | .244 | 4027    | .244 |
| Oklahoma       | 6885  | 2147  | .312 | 1809  | .263 | 10    | .001 | 334   | .048 | 2585    | .375 |
| Oregon         | 4220  | 974   | .231 | 2431  | .576 | 0     | .000 | 0     | .000 | 816     | .193 |
| Pennsylvania   | 8967  | 519   | .058 | 6489  | .724 | 0     | .000 | 1161  | .129 | 799     | .089 |
| Rhode Island   | 48    | 3     | .066 | 38    | .802 | 0     | .000 | 5     | .096 | 2       | .035 |
| South Carolina | 2445  | 421   | .172 | 967   | .395 | 26    | .011 | 350   | .143 | 681     | .279 |
| South Dakota   | 27430 | 3500  | .128 | 14439 | .526 | 0     | .000 | 4830  | .176 | 4661    | .170 |
| Tennessee      | 4239  | 555   | .131 | 1483  | .350 | 31    | .007 | 775   | .183 | 1395    | .329 |

|               |               |              |             |               |              |            |              |              |             |               |             |
|---------------|---------------|--------------|-------------|---------------|--------------|------------|--------------|--------------|-------------|---------------|-------------|
| Texas         | 12321         | 2485         | .202        | 3103          | .252         | 240        | .019         | 2567         | .208        | 3926          | .319        |
| Utah          | 1756          | 63           | .036        | 1681          | .957         | 0          | .000         | 0            | .000        | 13            | .007        |
| Vermont       | 1207          | 28           | .023        | 1054          | .873         | 0          | .000         | 96           | .079        | 30            | .024        |
| Virginia      | 3728          | 361          | .097        | 2319          | .622         | 7          | .002         | 321          | .086        | 720           | .193        |
| Washington    | 8296          | 3261         | .393        | 2426          | .292         | 0          | .000         | 211          | .025        | 2398          | .289        |
| West Virginia | 692           | 20           | .029        | 604           | .872         | 0          | .000         | 40           | .058        | 29            | .042        |
| Wisconsin     | 14324         | 1561         | .109        | 7077          | .494         | 0          | .000         | 3496         | .244        | 2190          | .153        |
| Wyoming       | 1641          | 276          | .168        | 1202          | .733         | 0          | .000         | 54           | .033        | 108           | .066        |
| <b>TOTAL</b>  | <b>503762</b> | <b>82862</b> | <b>.164</b> | <b>210044</b> | <b>0.417</b> | <b>767</b> | <b>0.002</b> | <b>98175</b> | <b>.195</b> | <b>111914</b> | <b>.222</b> |
